# Supplementary material
Source: PubMed Central journal article supplement (PMC8776246)

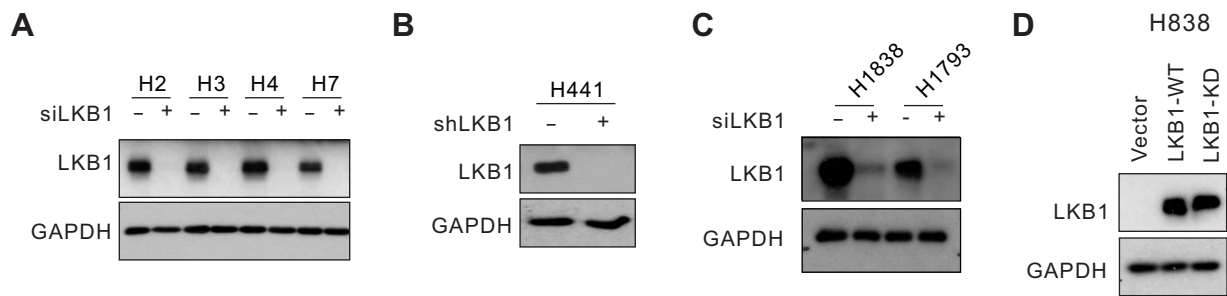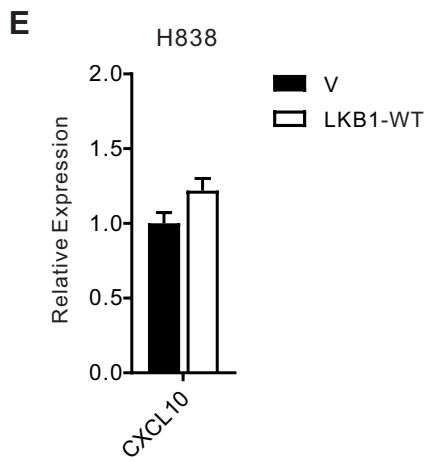

**A**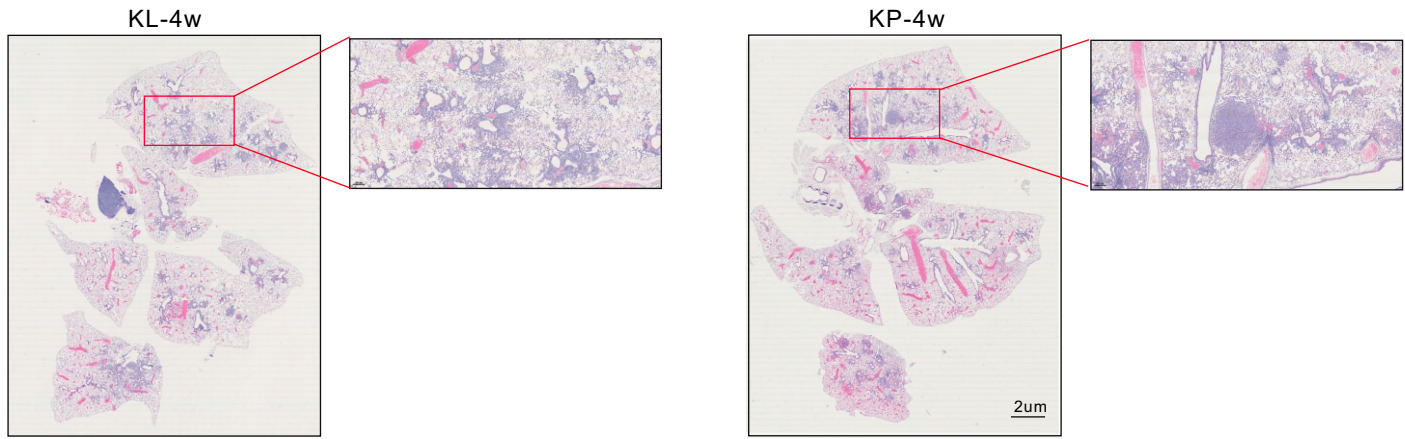**B**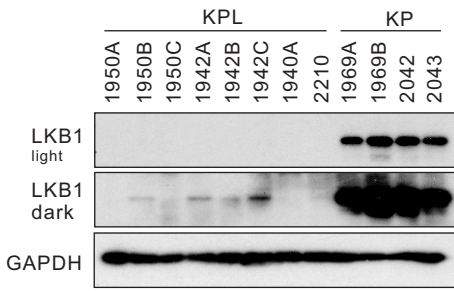**C**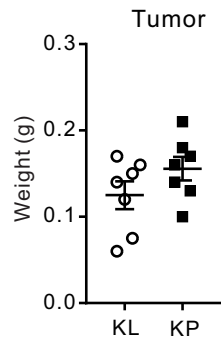**D**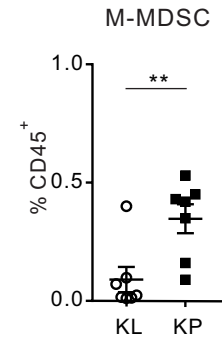**E**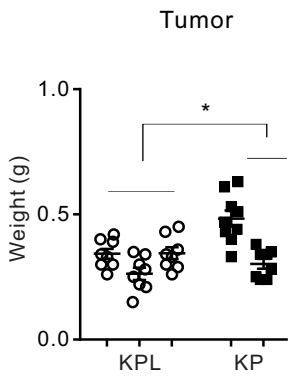**F**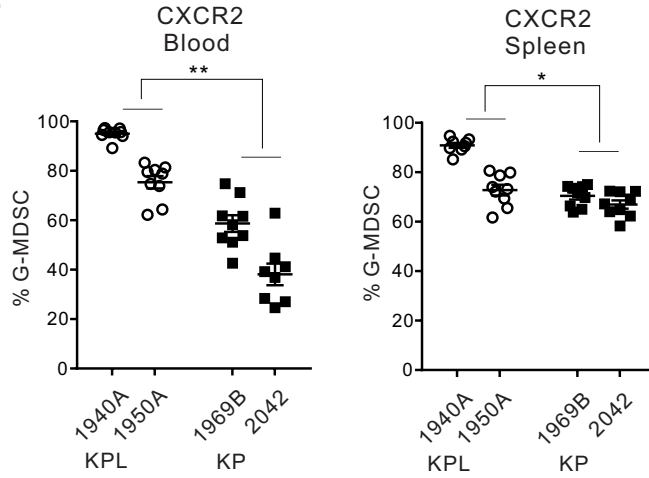**G**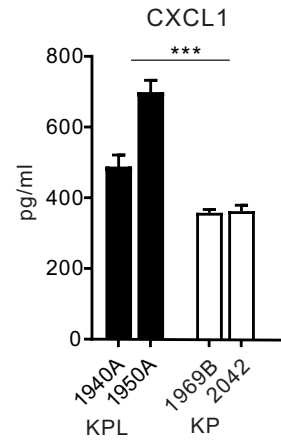

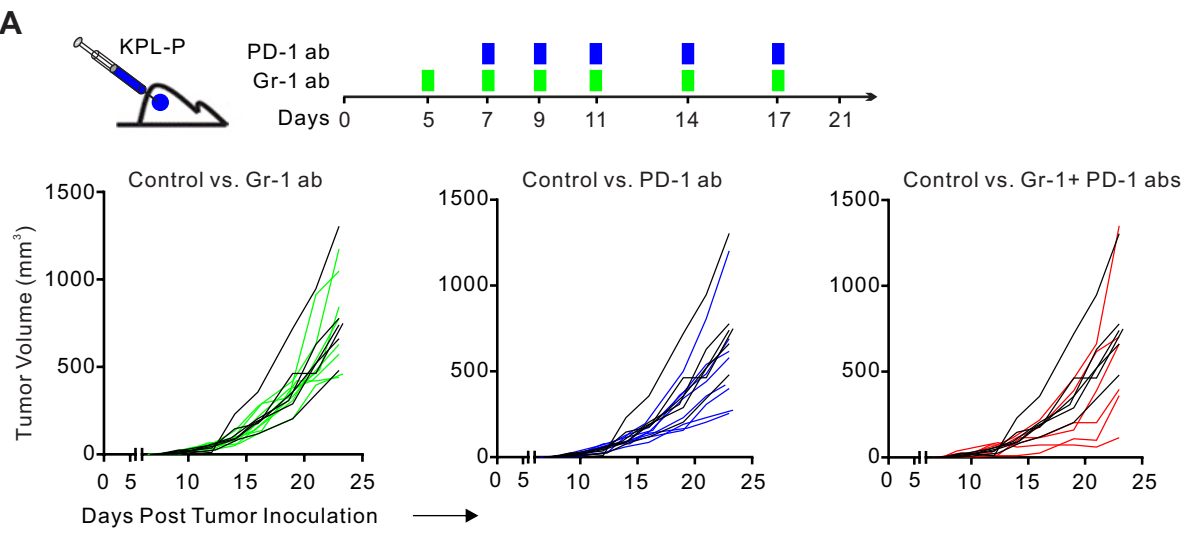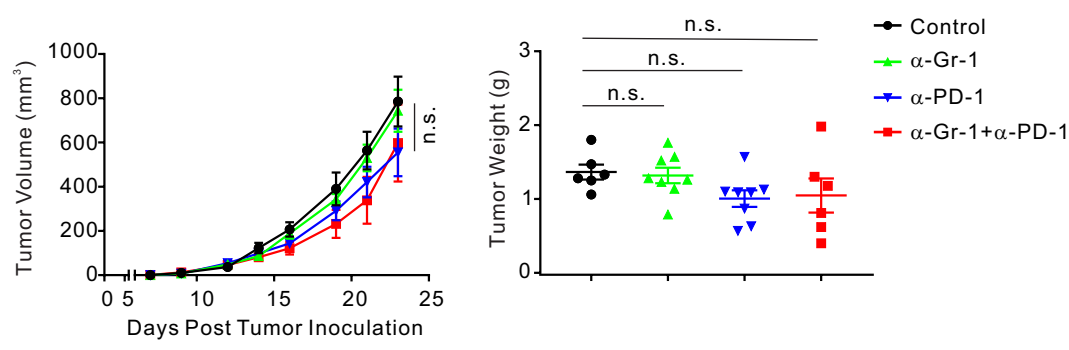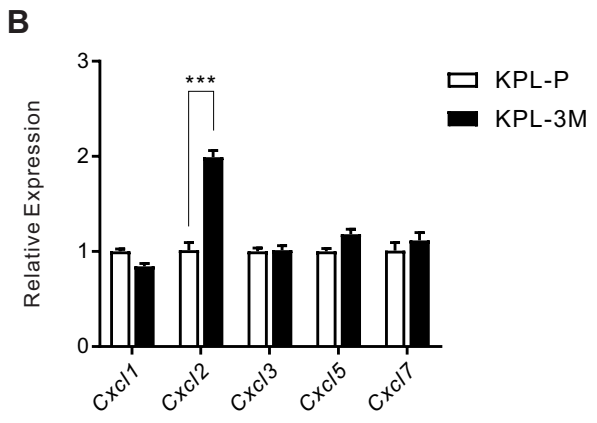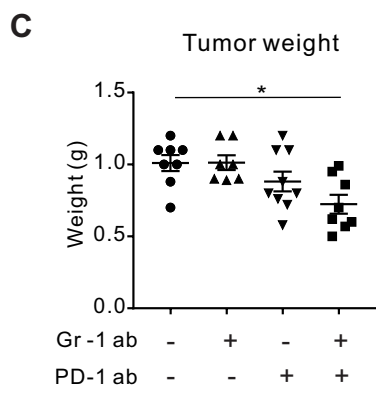

Fig. S3

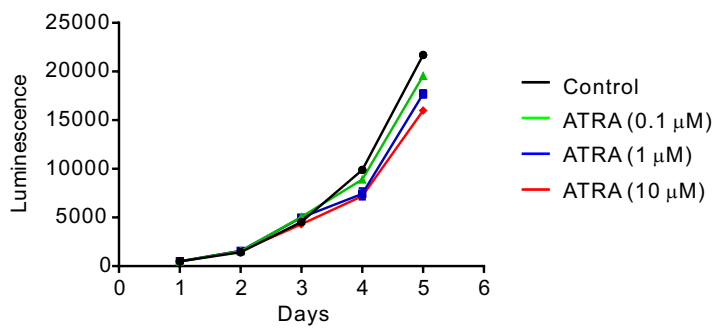

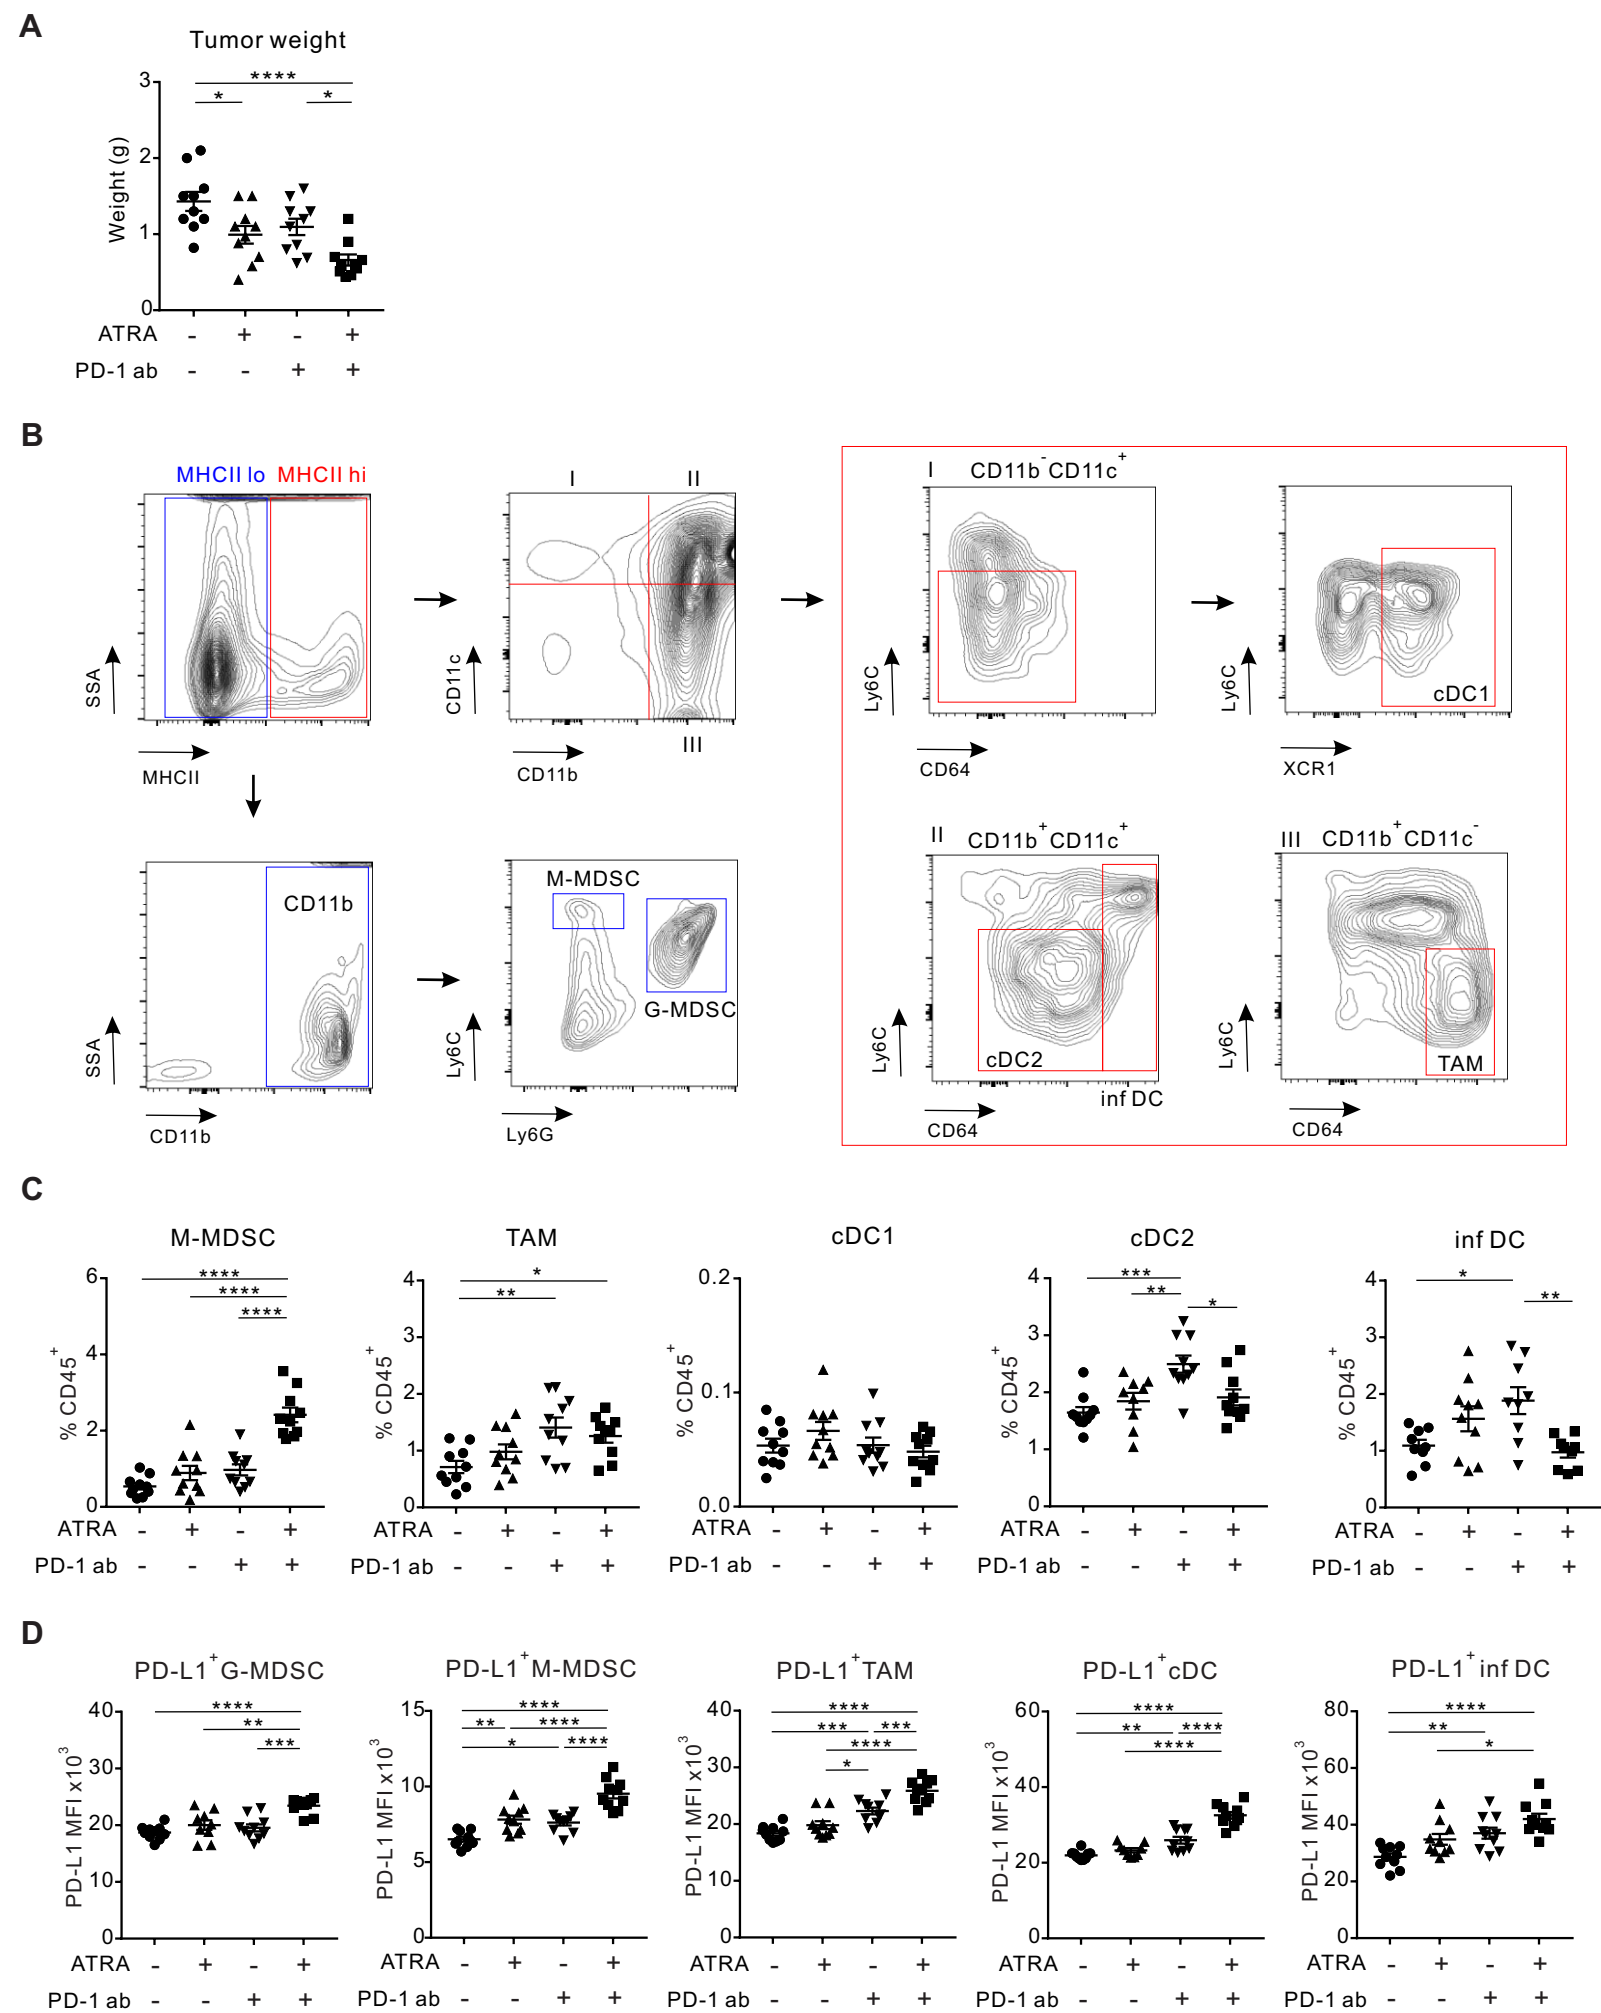

Fig. S5

**E**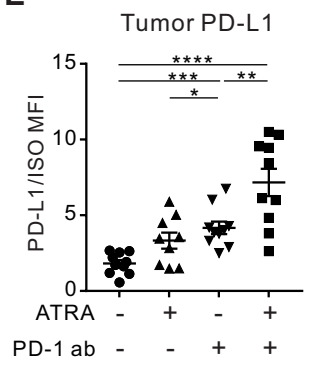**F**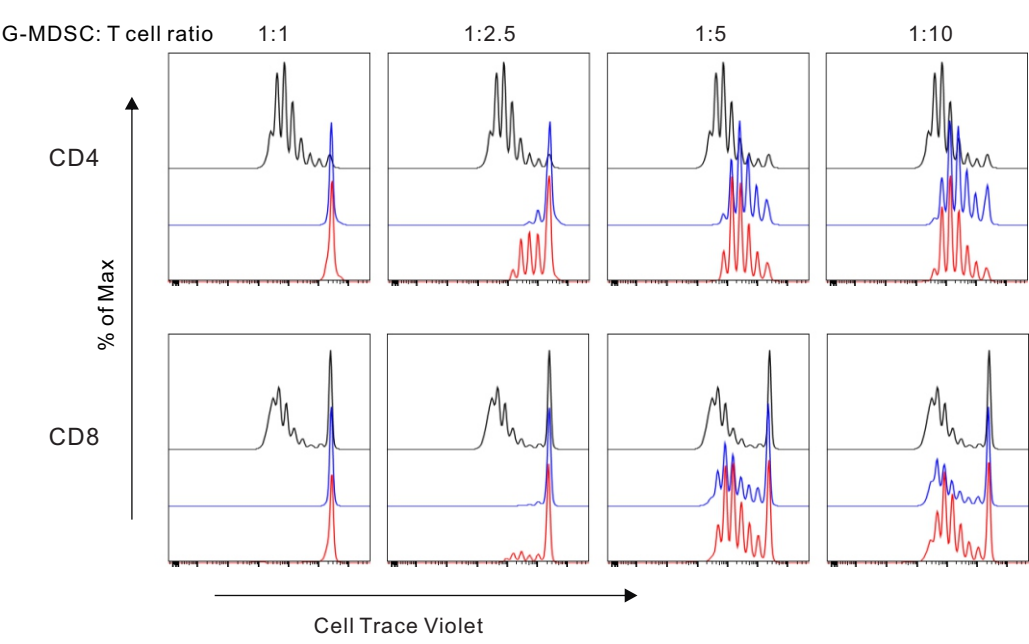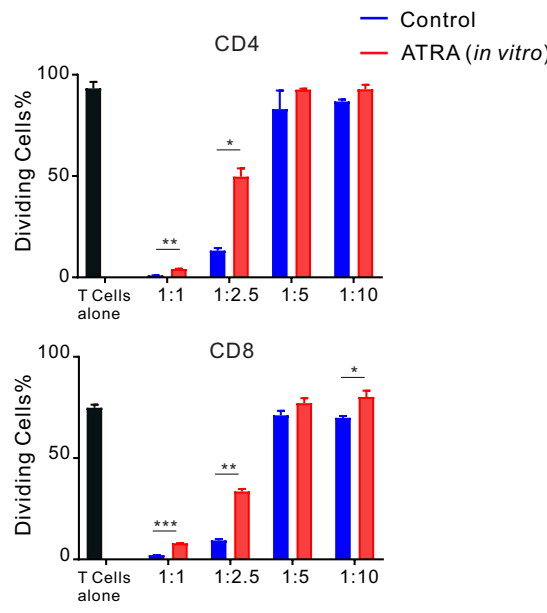**G**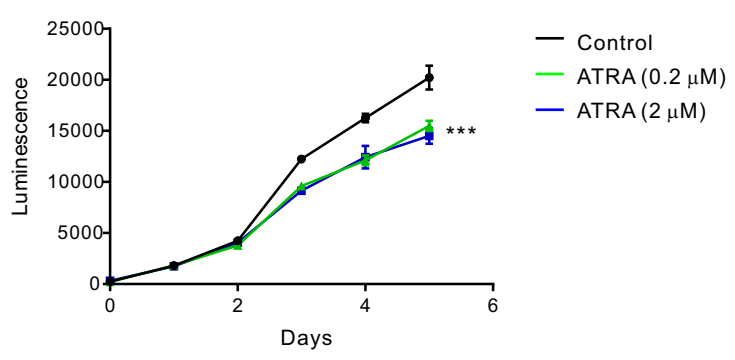

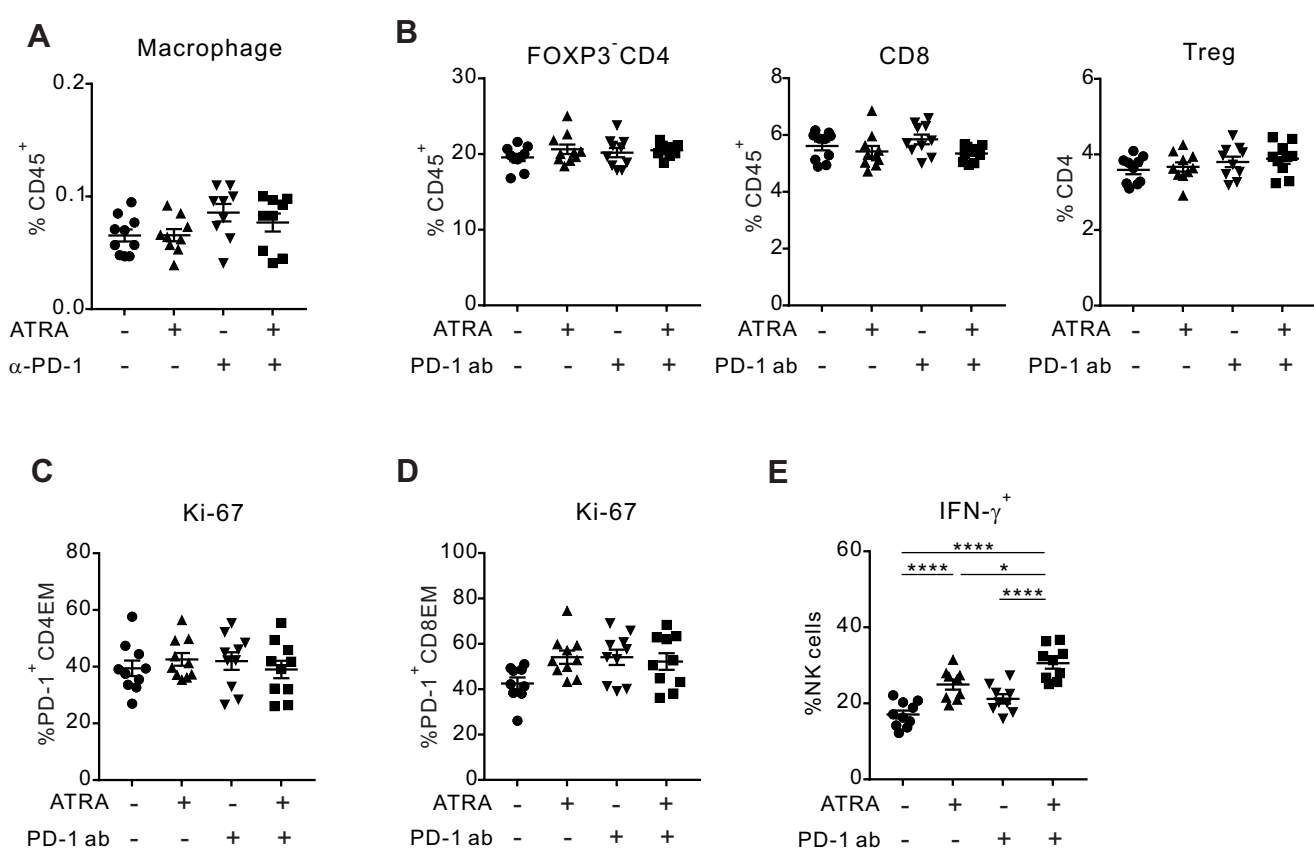

Fig. S6

Supplement: NIHMS1695967-supplement-Suppl_Figures.pdf [file NIHMS1695967-supplement-Suppl_Figures.pdf]
